# Supplementary material for: Potential Role of Circulating PD-L1+ Leukocytes as a Predictor of Response to Anti-PD-(L)1 Therapy in NSCLC Patients
Source: MDPI journal article supplement (doi:10.3390/biomedicines12050958), 2024-04-25
Supplement: s1 [file s1]

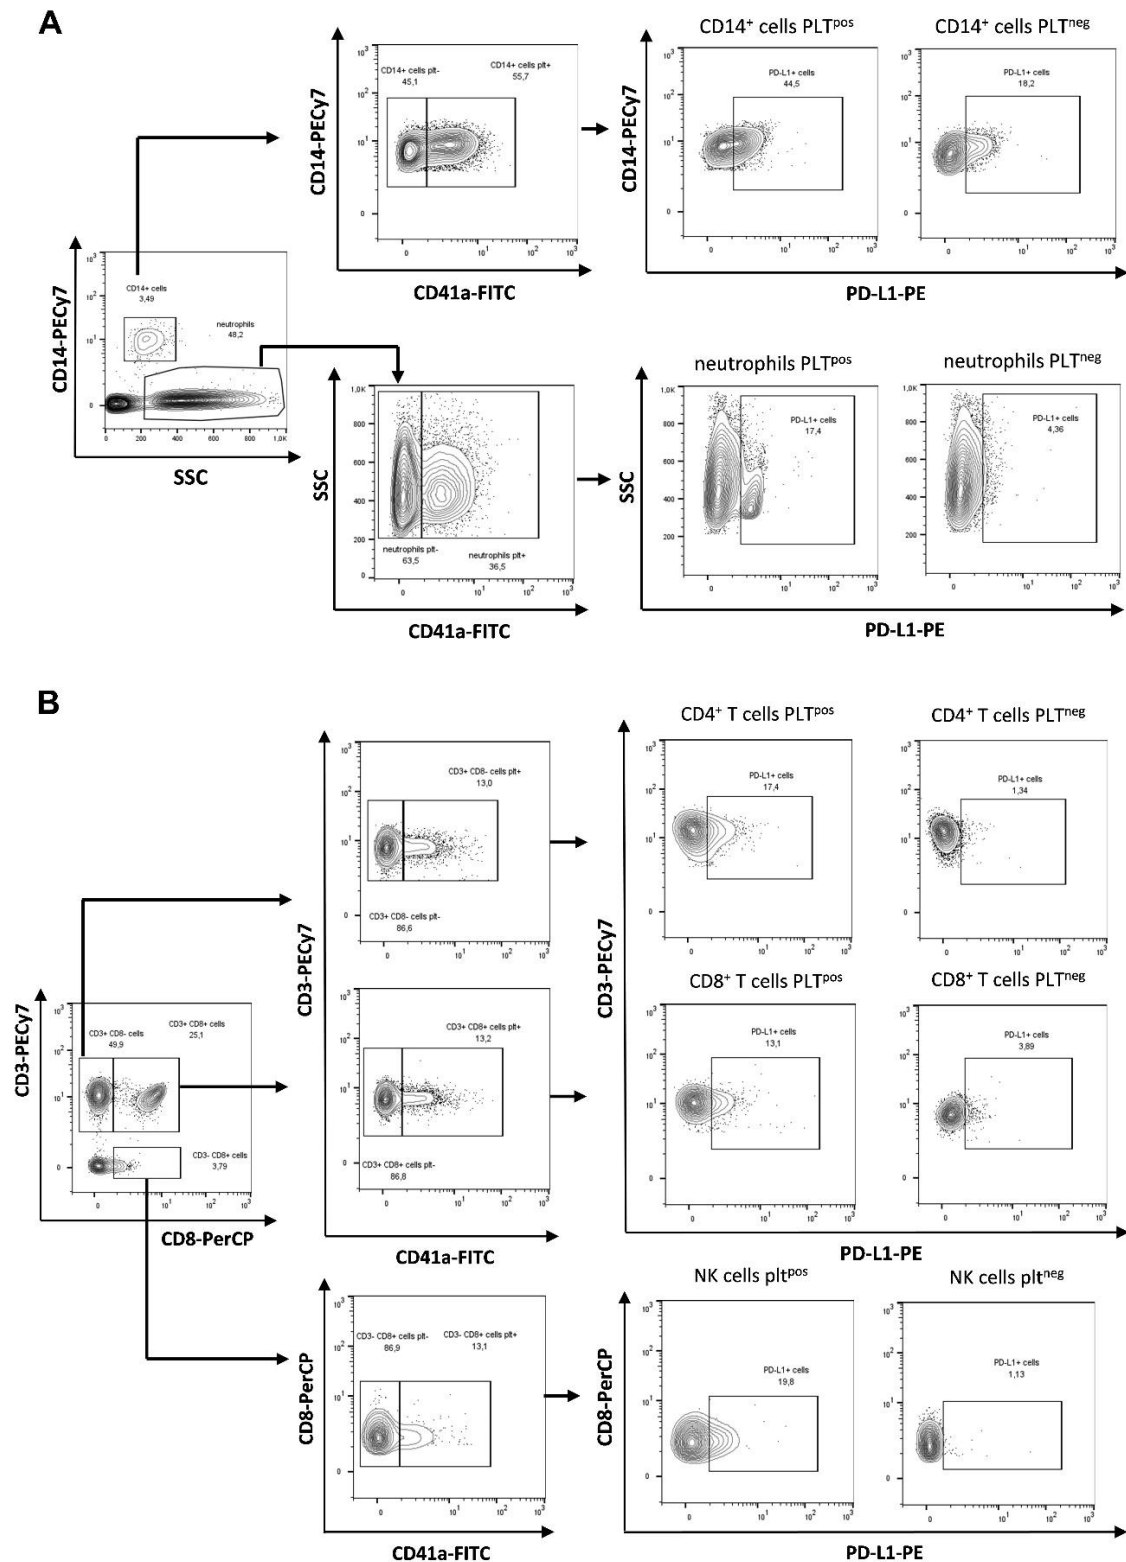

**Figure S1. Flow cytometry gating strategy for measuring PD-L1 expression on leukocytes with or without bound platelets. (A)** Monocytes and neutrophils were initially gated based on CD14 expression and SSC with monocytes being CD14<sup>+</sup> cells and neutrophils being CD14<sup>-</sup>. **(B)** Lymphocytes were initially gated according to FSC-SSC and then classified into CD4<sup>+</sup> and CD8<sup>+</sup> T cells based on CD3 and CD8 expression. NK cells were identified as CD3<sup>-</sup> CD8<sup>+</sup> cells. Leukocyte-platelet aggregates were determined by the positivity of the platelet-specific marker CD41a. Expression of PD-L1 was measured in both CD41a<sup>+</sup> and CD41a<sup>neg</sup> cells.

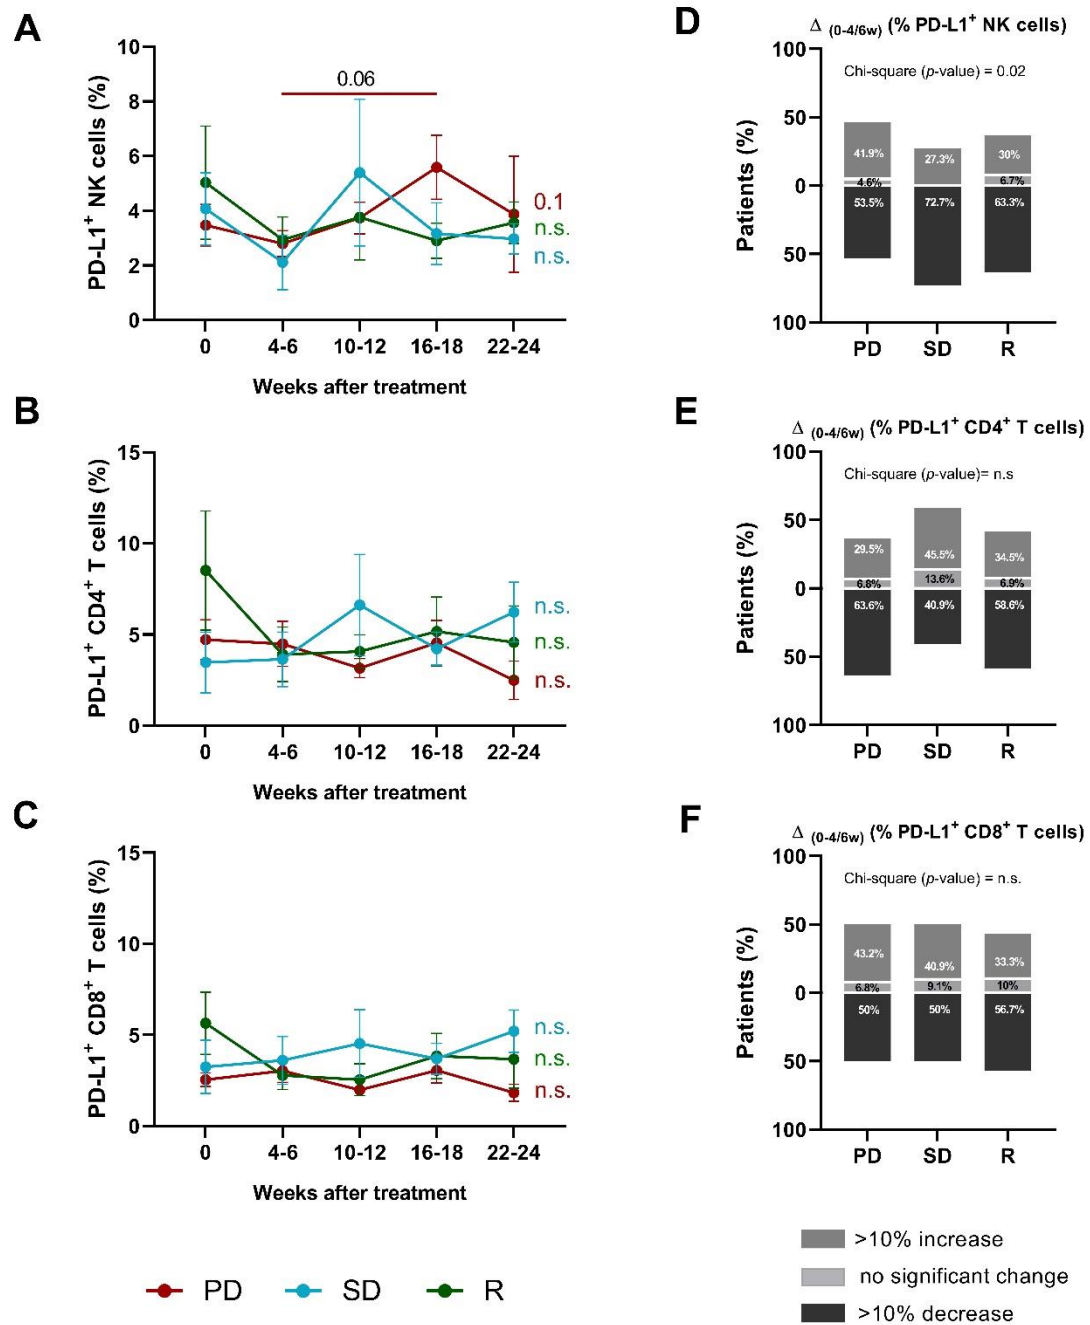

**Figure S2. Kinetics of PD-L1<sup>+</sup> NK cells and T lymphocytes in NSCLC patients based on anti-PD-(L)1 response.** Longitudinal monitoring of PD-L1<sup>+</sup> (A) NK, (B) CD4<sup>+</sup> and (C) CD8<sup>+</sup> T cells percentages during 24 weeks of anti-PD-(L)1 treatment in PD (red line), SD (blue line) and R patients (green line). Changes (>10% decrease (black), no significant change (with less than 10% change) (light grey), and >10% increase (dark grey) in the percentages of PD-L1<sup>+</sup> (D) NK, (E) CD4<sup>+</sup> and (F) CD8<sup>+</sup> T cells in the first 4-6 weeks of treatment. P-values are shown in graphs. n.s. is not significant. NSCLC, non-small cell lung cancer; PD, progressors; R, responders; SD, stable disease.

**Table S1.** Model fitting information of the multinomial logistic regression (obtained by SPSS).

| Model Fitting information |                        |                        |    |       |
|---------------------------|------------------------|------------------------|----|-------|
| Model                     | Model Fitting Criteria | Likelihood Ratio Tests |    |       |
|                           | -2 Log Likelihood      | Chi-Square             | df | Sig.  |
| Intercept only            | 94.76                  |                        |    |       |
| Final                     | 59.35                  | 35.41                  | 8  | 0.000 |

Df, degrees of freedom; Sig. Significance.
